# Supplementary figures and images for: Limitations of Bulk Diamond Sensors for Single-Cell Thermometry
Source: MDPI journal article supplement (doi:10.3390/s24010200), 2023-12-29

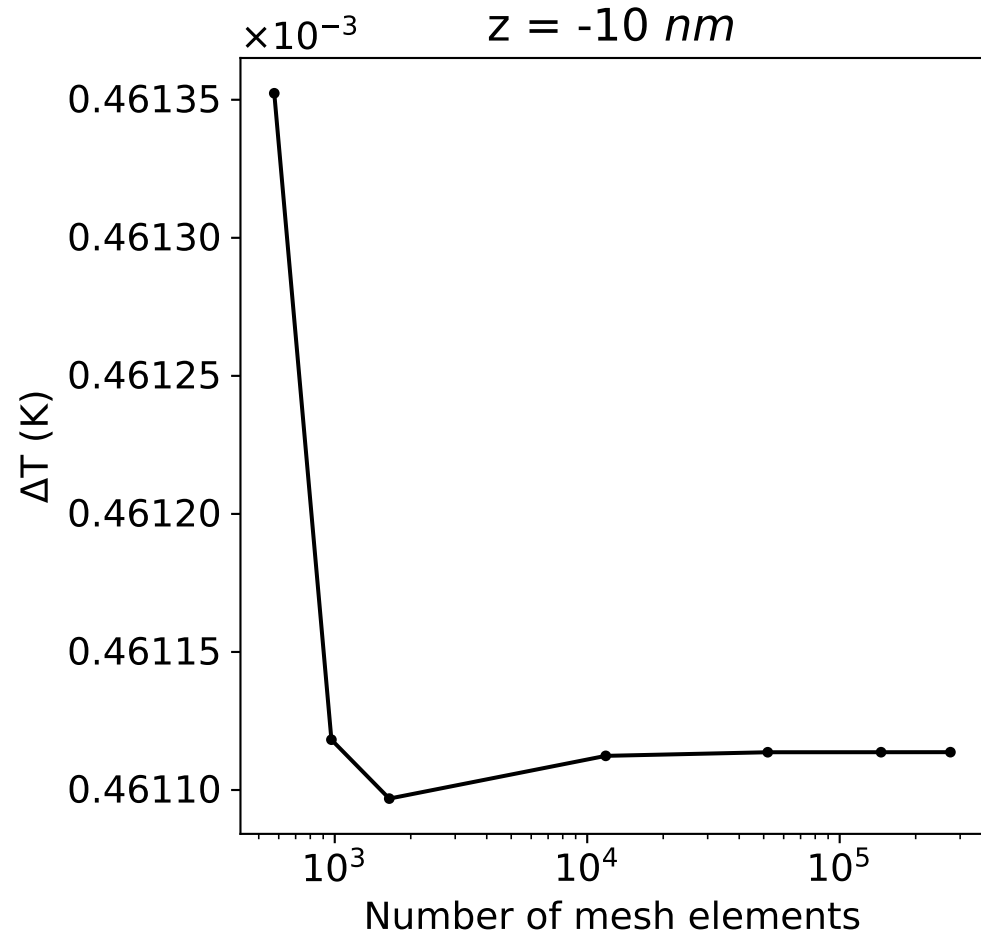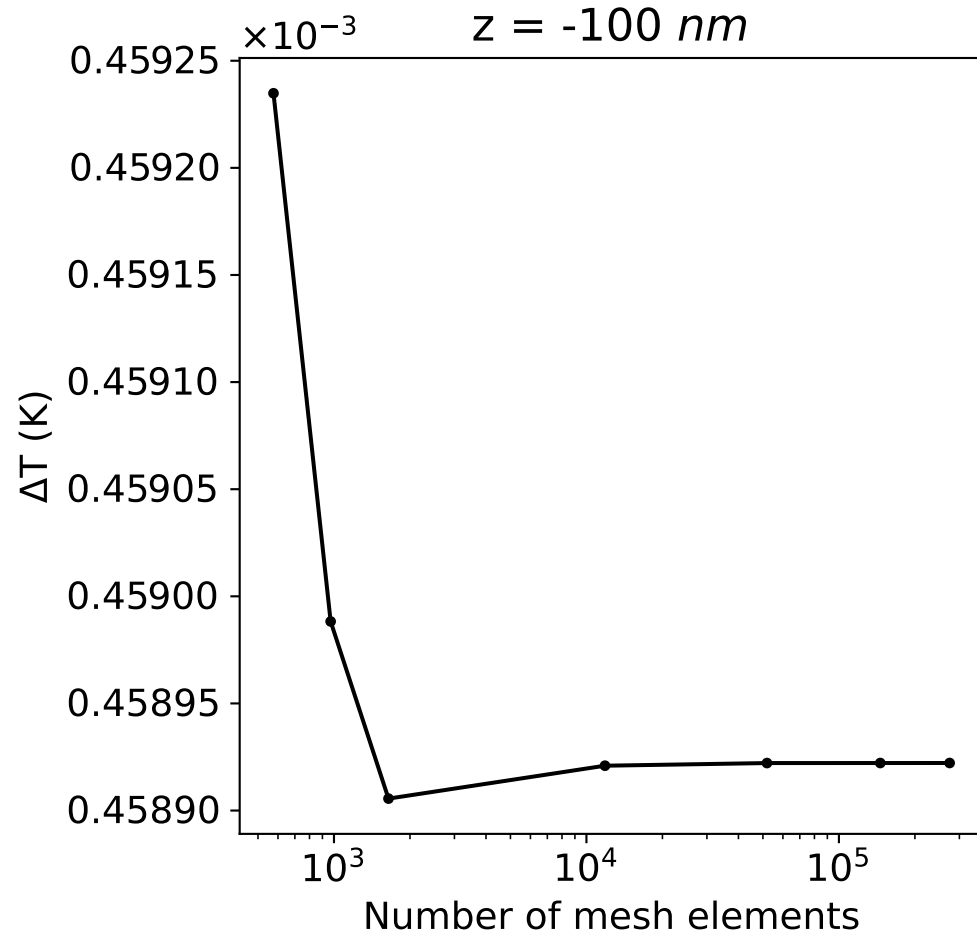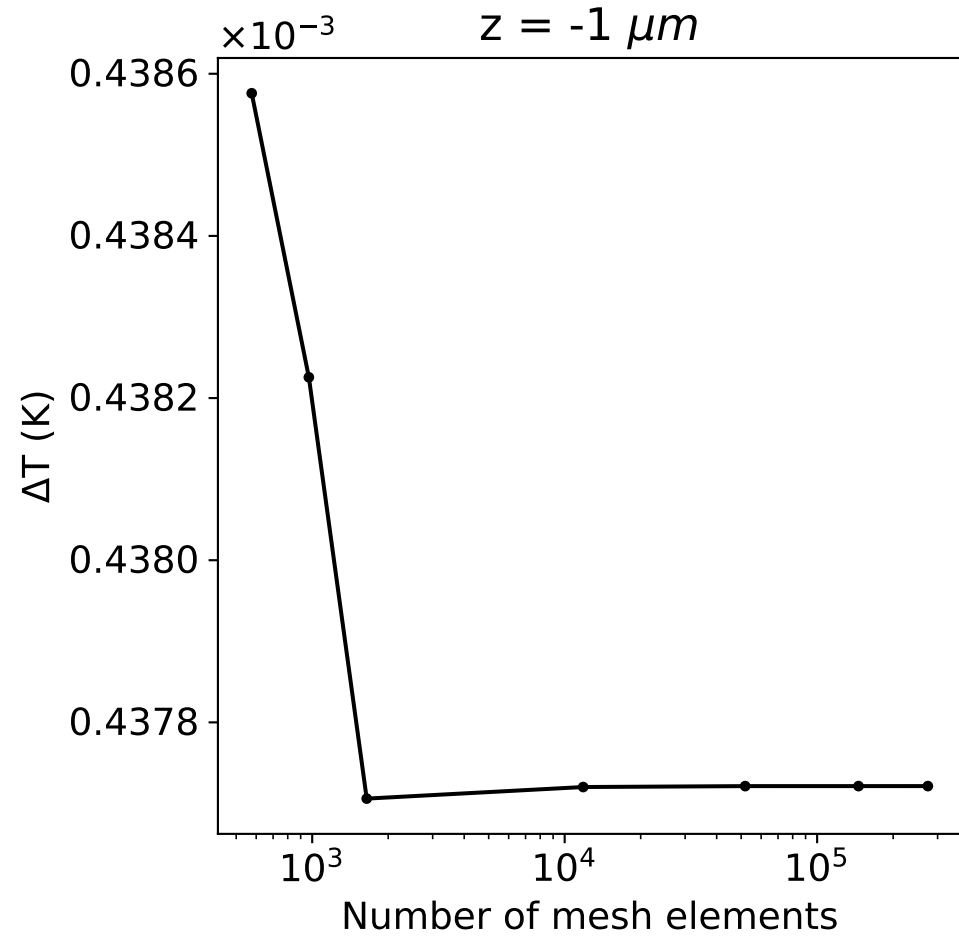

Supplement: s1 [file s1]

a)

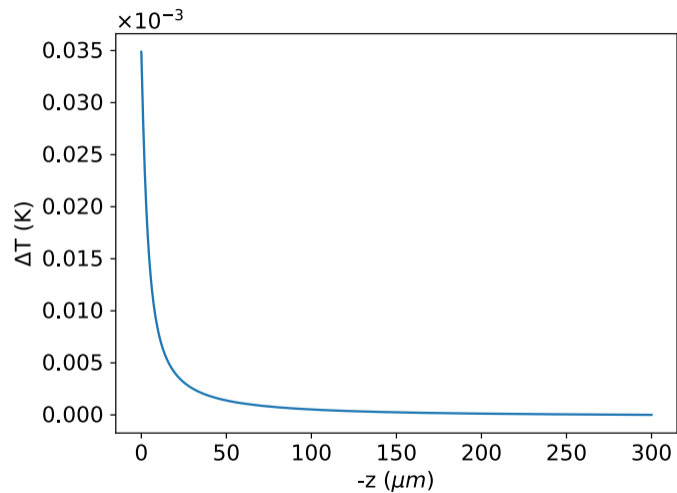

b)

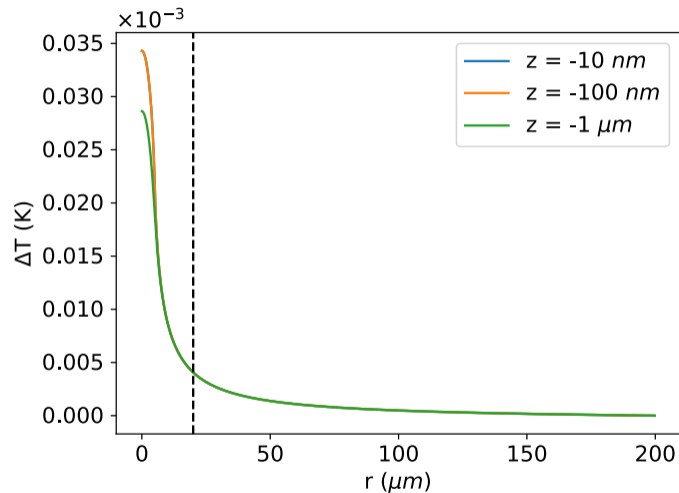

Supplement: s1 [file s1]
